# Supplementary material for: A porous polymer–silica composite with a “vespula-like” structure for thermal insulating materials prepared via high pressure phase control
Source: Royal Society of Chemistry journal article supplement (doi:10.1039/c3ta11772c), 2013-01-01
Supplement: c3ta11772c.pdf [file c3ta11772c.pdf]

Supplement Table 1 List of polymers in this work

|        | Supplier             | Product Name                | Chemical name / formula       | Average Molecular Weight | Tg<br>°C         | Tm<br>°C |
|--------|----------------------|-----------------------------|-------------------------------|--------------------------|------------------|----------|
| PDLLA  | Natureworks          | Biopolymer 4032D            | Poly (D, L-lactic acid)       | Mw=155,000 <sup>a</sup>  | 58 <sup>b</sup>  | 160      |
| PDLLAa | Natureworks          | Biopolymer 4060D            | Poly (D, L-lactic acid)       | Mw=158,000 <sup>a</sup>  | 56 <sup>b</sup>  |          |
| PMMA   | Sigma Aldrich        |                             | Poly (methyl methacrylate)    | Mw=120,000               | 105              |          |
| PMMAm  | Mitsubishi Rayon     | Acrypet IRK304 <sup>c</sup> | Poly (methyl methacrylate)    | Mw=80,000 <sup>a</sup>   | 117 <sup>b</sup> |          |
| PS     | Sigma Aldrich        |                             | Poly (styrene)                | Mw=280,000               | 100              |          |
| PET    | Sigma Aldrich        |                             | Poly (ethylene telephthalate) | Mv = 18,000              | 81               |          |
| LDPE   | Sigma Aldrich        |                             | Poly(ethylene), low density   |                          |                  | 116      |
| PP     | Chisso Petrochemical | FH3400                      | Porly(propyrene)              | Mw=229, 000              |                  | 165      |

a: Evaluated in our laboratory by gel permeation chromatography (GPC).

b: Evaluated in our laboratory by DSC. Other properties are depends on suppliers' reference. C: Impact-resistant variant

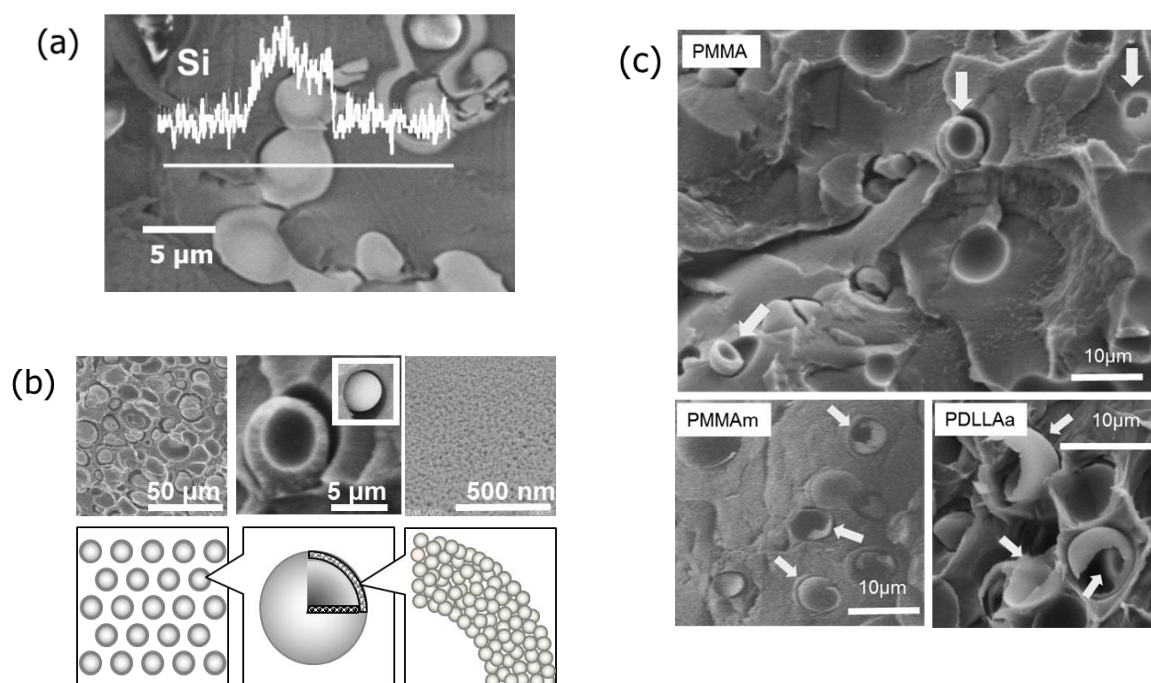

**Supplement Fig. 1** (a) SEM micrographs of PMMA-Silica composite with line analysis of silicon content. (b) Schematic diagram of “Vespula-like” composites with SEM micrographs of PMMA-Silica composite. (c) Typical capsular structures in samples.

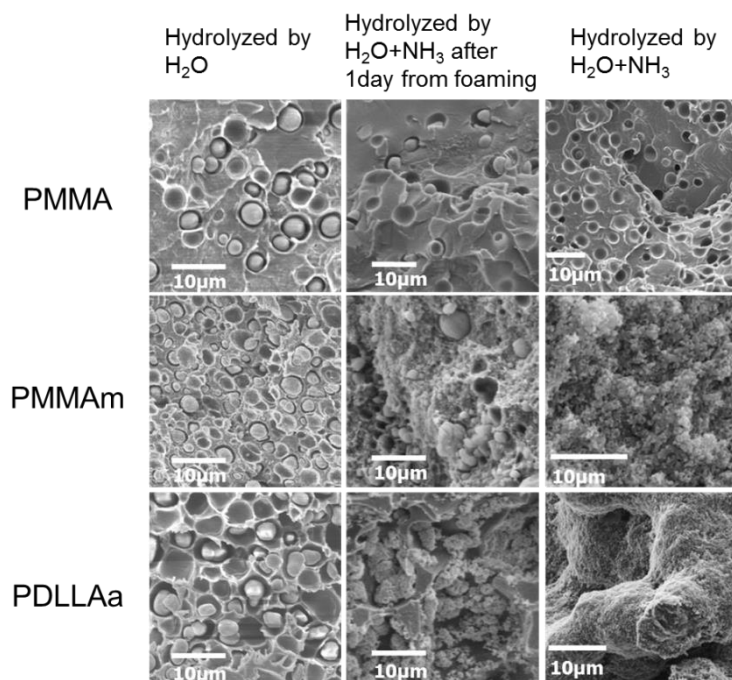

**Supplement Fig. 2** SEM micrographs of samples prepared by hydrolysis with  $0.1 \text{ mol/dm}^3$  ammonium solution after 1 day from foaming (centre column) compared with samples hydrolyzed by water (left column) and that by  $0.1 \text{ mol/dm}^3$  ammonium solution (right column) .
